# Supplementary material
Source: Springer Nature journal article supplement (https://www.springermedizin.de/resource/supplementary/13075_2012_4386_MOESM4_ESM.pdf/10110304)

**A. Vascular cell adhesion molecule (VCAM-1)**

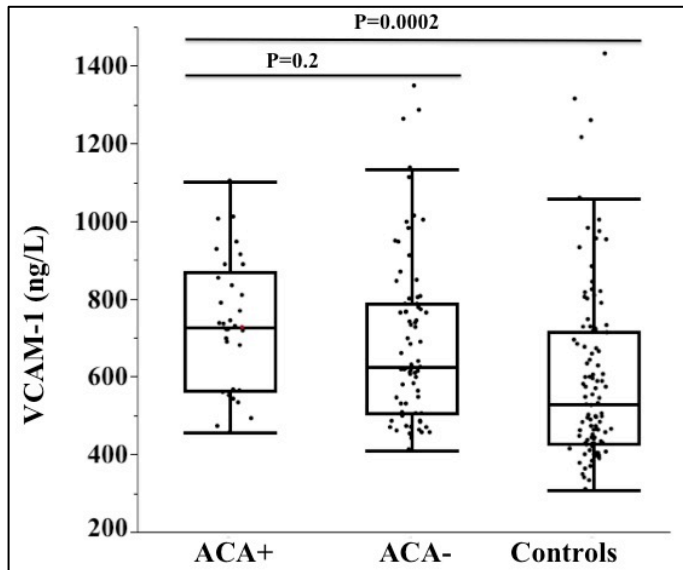

**B. Intercellular adhesion molecule (ICAM-1)**

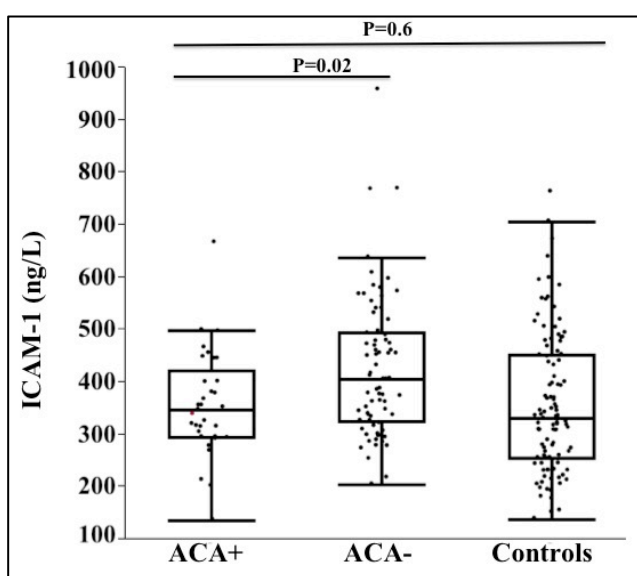

**C. Von Willebrand factor (vWf)**

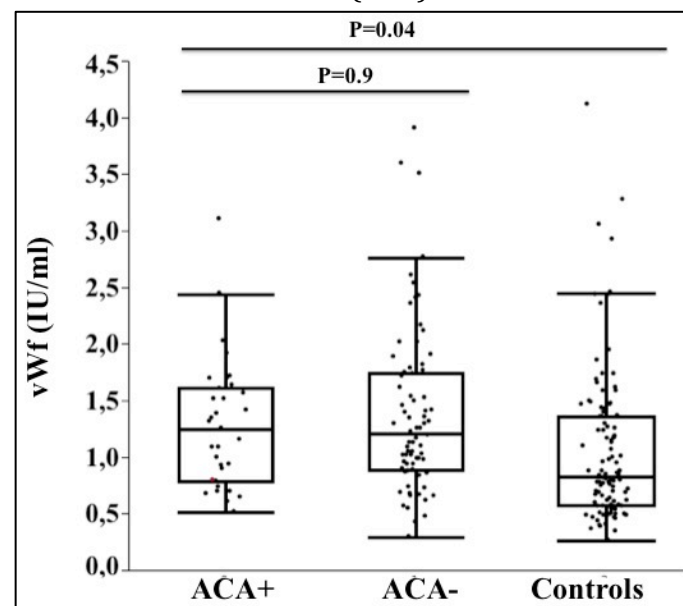

**D. Vascular endothelial growth factor (VEGF)**

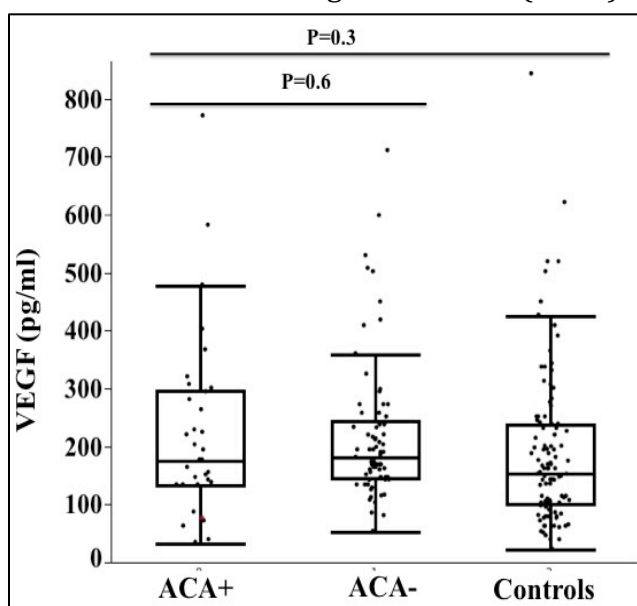

Supplement: MOESM4 [file 10110304]
